# Supplementary material
Source: publisher site journal article supplement (https://www.dovepress.com/article/329045)
Supplement: Supplementary file 1 [file get_supplementary_file.php]

| Supplementary 1. The association between Contraceptive method BMI and Anemia | | | | | |
| --- | --- | --- | --- | --- | --- |
|  |  | **Contraceptive Method** | | |  |
| **BMI** |  | **No use** | **Traditional** | **Modern** | **P-value** |
|  | **Anemia** |  |  |  |  |
| **Underweight** | No | 1780 (80.9) | 9 (0.4) | 410 (18.6) |  |
|  | Yes | 881 (86.9) | 2 (0.2) | 132 (13.0) | 0.000 |
| **Normal** | N0 | 4429 (72.0) | 40 (0.7) | 1682 (27.3) |  |
|  | Yes | 1701 (81.5) | 8 (0.4) | 378 (18.1) | 0.000 |
| **Overweight** | No | 785 (66.6) | 21 (1.8) | 372 (31.6) |  |
|  | Yes | 242 (78.8) | 2 (0.7) | 63 (20.5) | 0.000 |
| N given by percentage (n%) | | | | |  |
